# Supplementary material for: Linkage Mapping and Comparative Genomics Using Next-Generation RAD Sequencing of a Non-Model Organism
Source: PubMed Central journal article supplement (PMC3082572; doi:10.1371/journal.pone.0019315), 2011-04-26
Supplement: pone.0019315.s005.pdf [file pone.0019315.s005.pdf]

## Table S4

### A. Loci with normalised fragment counts

| Fragment Count Threshold | Number of Mismatches |       |       |       |       |       |       |
|--------------------------|----------------------|-------|-------|-------|-------|-------|-------|
|                          | 0                    | 1     | 2     | 3     | 4     | 5     | 6     |
| >=1                      | 10,385               | 9,252 | 8,971 | 8,813 | 8,700 | 8,600 | 8,532 |
| >=2                      | 9,826                | 8,933 | 8,662 | 8,517 | 8,407 | 8,312 | 8,241 |
| >=3                      | 9,502                | 8,756 | 8,483 | 8,342 | 8,234 | 8,140 | 8,066 |
| >=4                      | 9,232                | 8,555 | 8,295 | 8,149 | 8,045 | 7,959 | 7,891 |
| >=5                      | 8,975                | 8,332 | 8,084 | 7,947 | 7,847 | 7,763 | 7,696 |
| >=6                      | 8,770                | 8,156 | 7,917 | 7,785 | 7,692 | 7,615 | 7,548 |

### B. Loci with raw fragment counts

| Fragment Count Threshold | Number of Mismatches |       |       |       |       |       |       |
|--------------------------|----------------------|-------|-------|-------|-------|-------|-------|
|                          | 0                    | 1     | 2     | 3     | 4     | 5     | 6     |
| >=1                      | 11,025               | 9,825 | 9,533 | 9,367 | 9,251 | 9,150 | 9,079 |
| >=2                      | 10,286               | 9,170 | 8,892 | 8,734 | 8,621 | 8,523 | 8,454 |
| >=3                      | 9,742                | 8,897 | 8,626 | 8,475 | 8,365 | 8,272 | 8,199 |
| >=4                      | 9,444                | 8,717 | 8,449 | 8,302 | 8,194 | 8,105 | 8,032 |
| >=5                      | 9,189                | 8,511 | 8,253 | 8,107 | 8,002 | 7,920 | 7,847 |
| >=6                      | 8,995                | 8,345 | 8,100 | 7,960 | 7,860 | 7,776 | 7,709 |
